# Supplementary material for: Development of high methanol-tolerance Pichia pastoris based on iterative adaptive laboratory evolution
Source: Royal Society of Chemistry journal article supplement (doi:10.1039/d3gc02874g), 2023-01-01
Supplement: d3gc02874g1.pdf [file d3gc02874g1.pdf]

## SUPPLEMENTARY MATERIALS

---

### **Development of high methanol tolerance *Pichia pastoris* based on iterative adaptive laboratory evolution**

Shuai Wang<sup>a</sup>, Yuanyuan Wang<sup>a</sup>, Qingyan Yuan<sup>a</sup>, Liu Yang<sup>a</sup>, Fengguang Zhao<sup>b</sup>, Ying Lin<sup>a</sup>,  
Shuangyan Han<sup>a\*</sup>

*<sup>a</sup>School of Biology and Biological Engineering, South China University of Technology,  
Guangzhou 510006, Guangdong, China*

*<sup>b</sup>School of Light Industry and Engineering, South China University of Technology, Guangzhou,  
510006, Guangdong, China*

\* Corresponding author.

*E-mail address: [syhan@scut.edu.cn](mailto:syhan@scut.edu.cn) (S. Han)*

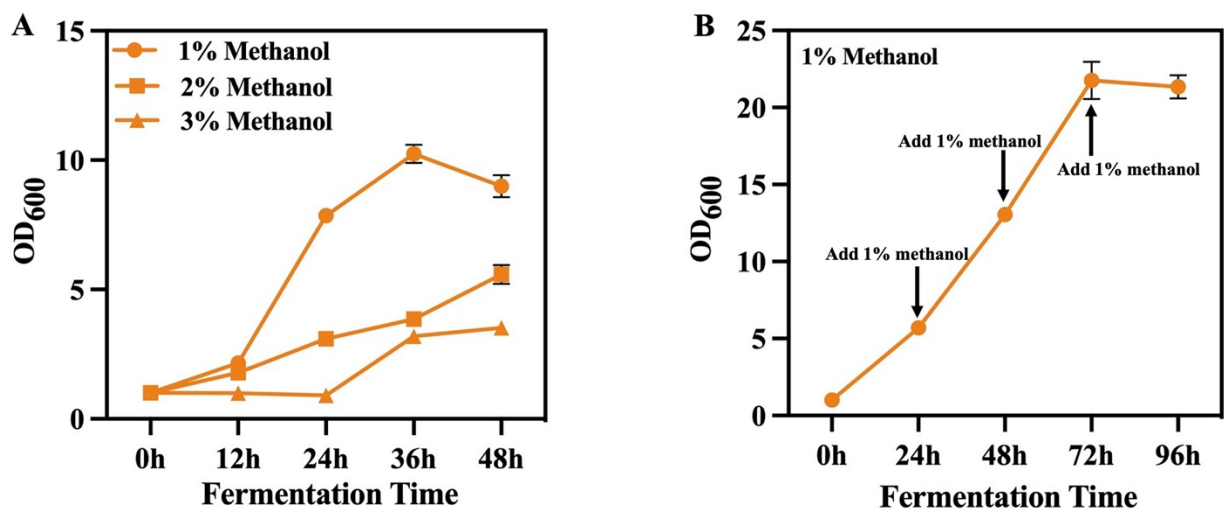

**Fig. S1** (A) Growth curves of *Pichia pastoris* GS115 with initial methanol concentrations of 1%, 2% and 3%. (B) Growth curve of *Pichia pastoris* GS115 with an initial methanol concentration of 1% and 1% methanol was added every 24h. Values are the average of at least three biological replicates with error bars indicating one standard deviation.

**Table S1** Primers used in this study.

| Names                | Characteristics                                                                                             |            |
|----------------------|-------------------------------------------------------------------------------------------------------------|------------|
| Strains              |                                                                                                             |            |
| GS115                | <i>his4<sup>-</sup></i>                                                                                     | Invitrogen |
| WS026-4/14 (MMC)     | GS115 evolution with MMC                                                                                    | This study |
| WS026-4/14 (MMC-SFC) | WS026-4/14 (MMC) evolution with flask culture                                                               | This study |
| GS115-PET2           | GS115 harboring plasmid pPICZA-PET2                                                                         | This study |
| Plasmid              |                                                                                                             |            |
| pPICZA               | Expression vector with P <sub>AOX1</sub> promoter, P <sub>AOX1</sub> terminator and Zeo <sup>R</sup> marker | Invitrogen |
| pPICZA-PET2          | pPICZA carrying gene <i>PET2</i>                                                                            | This study |

| Primers | Sequence (5'→3')          | Objective                              |
|---------|---------------------------|----------------------------------------|
| PET2-F  | atggctgatcgacttgtttctaac  | PCR primers for <i>PET2</i> from GS115 |
| PET2-R  | ctacaaactcttttcttctttgt   |                                        |
| P1      | gagaagtccaagaacaacaacc    | RT-qPCR primers for <i>CRD1</i>        |
| P2      | tgacaggttcagcatcttttagtgg |                                        |
| P3      | gaaaggcatcagagccatcgt     | RT-qPCR primers for <i>GEP4</i>        |
| P4      | ctatgtccctcgtcgtcgttcg    |                                        |
| P5      | tctccgatttactctggcggcact  | RT-qPCR primers for <i>PET1</i>        |
| P6      | aagagttgtgacttcgcttttggtg |                                        |
| P7      | gacagagtgacctcgttccatt    | RT-qPCR primers for <i>PET2</i>        |
| P8      | tctttgctgtgaatggctcctc    |                                        |
| P9      | acggtccagggtagatgtagac    | RT-qPCR primers for <i>PGS1</i>        |
| P10     | gtgctgtaacccaataaaccttc   |                                        |
| P11     | tgacggtaaagtgccagattgc    | RT-qPCR primers for <i>PAS</i>         |
| P12     | agaggcgggagcaaccccaaat    |                                        |
| P13     | caagtgaccaatcgtgag        | RT-qPCR primers for <i>PSD1</i>        |
| P14     | aatcgggtgtaatctcctgg      |                                        |
